# Supplementary material for: Photoluminescent hybrid materials of lanthanide (Eu3+, Sm3+) polyoxometalates and polymer resin through ionic liquid linker
Source: Springer Nature journal article supplement (doi:10.1007/s00396-014-3471-x), 2014-12-01
Supplement: MOESM4 [file 10947406]

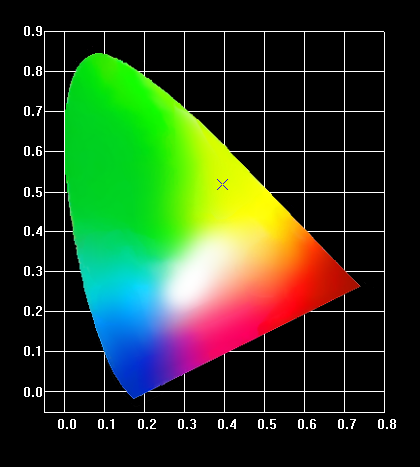


**Figure S4** Luminescent excitation and emission spectra of the hybrids EuW10-SHIL-MR, the bottom is its CIE chromaticity diagram
